# Supplementary material for: Factors Associated With Emergency Department Use by Patients With and Without Mental Health Diagnoses
Source: PubMed Central journal article supplement (PMC6324434; doi:10.1001/jamanetworkopen.2018.3528), 2018-10-19
Supplement: jamanetwopen-1-e183528-s001.pdf [file jamanetwopen-1-e183528-s001.pdf]

## Supplementary Online Content

Niedzwiecki MJ, Sharma PJ, Kanzaria HK, McConville S, Hsia RY. Factors associated with emergency department use by patients with and without mental health diagnoses. *JAMA Netw Open*. 2018;1(6):e183528. doi:10.1001/jamanetworkopen.2018.3528

**eTable 1.** Comparison of Visits With and Without a Valid Record Linkage Number

**eTable 2.** Healthcare Cost and Utilization Project Mental Health Severity Index, Reproduced From Coffey 2011

**eTable 3.** Logistic Regression Analysis (Sensitivity)

**eTable 4.** Regression Sensitivity Analysis: 2+ HCUP Diagnoses Needed to Categorize Mild/Moderate/Severe

This supplementary material has been provided by the authors to give readers additional information about their work.

**eTable 1. Comparison of Visits With and Without a Valid Record Linkage Number**

| <b>Variables</b>                                                                  | <b>Proportion, Invalid RLN</b> | <b>Proportion, Valid RLN</b> | <b>Difference (Invalid - Valid)</b> | <b>P-value</b> |
|-----------------------------------------------------------------------------------|--------------------------------|------------------------------|-------------------------------------|----------------|
| <b><i>Patient Characteristics</i></b>                                             |                                |                              |                                     |                |
| Age 18 to 30                                                                      | 42.8%                          | 30.2%                        | 0.126                               | <0.01          |
| Age 31 to 40                                                                      | 26.1%                          | 20.1%                        | 0.060                               | <0.01          |
| Age 41 to 50                                                                      | 17.5%                          | 20.9%                        | -0.034                              | <0.01          |
| Age 51 to 64                                                                      | 13.6%                          | 28.8%                        | -0.152                              | <0.01          |
| Male                                                                              | 45.3%                          | 43.9%                        | 0.013                               | <0.01          |
| White                                                                             | 21.6%                          | 44.9%                        | -0.234                              | <0.01          |
| Black                                                                             | 4.9%                           | 14.4%                        | -0.096                              | <0.01          |
| Hispanic                                                                          | 62.0%                          | 30.6%                        | 0.314                               | <0.01          |
| Other Race                                                                        | 4.4%                           | 4.5%                         | -0.002                              | <0.01          |
| Unknown Race                                                                      | 7.2%                           | 5.5%                         | 0.017                               | <0.01          |
| Privately Insured, Always                                                         | 25.7%                          | 38.3%                        | -0.126                              | <0.01          |
| Medicare Insured, Ever                                                            | 1.4%                           | 10.1%                        | -0.087                              | <0.01          |
| Medicaid Insured, Ever                                                            | 31.3%                          | 25.9%                        | 0.054                               | <0.01          |
| Uninsured, Ever                                                                   | 41.6%                          | 25.7%                        | 0.159                               | <0.01          |
| Urban County of Patient Residence                                                 | 93.9%                          | 94.3%                        | -0.003                              | <0.01          |
| <b><i>Visit Characteristics</i></b>                                               |                                |                              |                                     |                |
| Ever Admitted Inpatient                                                           | 10.2%                          | 12.2%                        | -0.020                              | <0.01          |
| Any Primary MH Diagnosis                                                          | 6.8%                           | 6.7%                         | 0.002                               | <0.01          |
| <b><i>Non-Mental Health CCS Codes (individual level)</i></b>                      |                                |                              |                                     |                |
| Infectious and Parasitic Diseases                                                 | 7.1%                           | 8.6%                         | -0.016                              | <0.01          |
| Neoplasms                                                                         | 2.1%                           | 3.8%                         | -0.017                              | <0.01          |
| Endocrine; nutritional; and metabolic diseases and immunity disorders             | 14.6%                          | 23.4%                        | -0.089                              | <0.01          |
| Diseases of the blood and blood-forming organs                                    | 4.6%                           | 6.3%                         | -0.017                              | <0.01          |
| Diseases of the nervous system and sense organs                                   | 16.7%                          | 21.7%                        | -0.050                              | <0.01          |
| Diseases of the circulatory system                                                | 17.0%                          | 27.3%                        | -0.103                              | <0.01          |
| Diseases of the respiratory system                                                | 13.9%                          | 18.9%                        | -0.050                              | <0.01          |
| Diseases of the digestive system                                                  | 14.4%                          | 18.4%                        | -0.040                              | <0.01          |
| Diseases of the genitourinary system                                              | 14.3%                          | 15.7%                        | -0.014                              | <0.01          |
| Complications of pregnancy; childbirth; and the puerperium                        | 7.4%                           | 4.5%                         | 0.029                               | <0.01          |
| Diseases of the skin and subcutaneous tissue                                      | 4.6%                           | 6.5%                         | -0.019                              | <0.01          |
| Diseases of the musculoskeletal system and connective tissue                      | 10.6%                          | 17.1%                        | -0.065                              | <0.01          |
| Congenital anomalies                                                              | 0.4%                           | 0.6%                         | -0.002                              | <0.01          |
| Certain conditions originating in the perinatal period                            | 0.0%                           | 0.0%                         | 0.000                               | 0.10           |
| Injuries and poisoning                                                            | 23.6%                          | 22.0%                        | 0.016                               | <0.01          |
| Symptoms; signs; and ill-defined conditions and factors influencing health status | 25.6%                          | 29.3%                        | -0.037                              | <0.01          |
| Residual codes; unclassified; all E codes                                         | 7.4%                           | 11.6%                        | -0.042                              | <0.01          |
| <b>N</b>                                                                          | <b>875,110</b>                 | <b>6,698,794</b>             |                                     |                |

Notes: Visit level data from 2013. Patient's home zip code and county determined by the modal zip and county, respectively, over all visits.

**eTable 2. Healthcare Cost and Utilization Project Mental Health Severity Index, Reproduced from Coffey 2011**

| Categories of M/SU disorders                                              | ICD-9-CM Diagnosis Codes by Category and Severity Level                                                                                                                                                                                                                                                                                                                                                                                                               |
|---------------------------------------------------------------------------|-----------------------------------------------------------------------------------------------------------------------------------------------------------------------------------------------------------------------------------------------------------------------------------------------------------------------------------------------------------------------------------------------------------------------------------------------------------------------|
|                                                                           | <b>Severe</b>                                                                                                                                                                                                                                                                                                                                                                                                                                                         |
| Psychoses (not in NCS-R)                                                  | 295(all); 297(all); 298(all)                                                                                                                                                                                                                                                                                                                                                                                                                                          |
| Bipolar I and II conditions                                               | 296.00-06, 10-16, 40-46, 50-56, 60-66; 296.7; 296.80-82, 89, 90, 99                                                                                                                                                                                                                                                                                                                                                                                                   |
| Drug dependence                                                           | 304 (all); 648.3(all); 655.5(all); 760.72, 73, 75; 779.5; 965.0(all)                                                                                                                                                                                                                                                                                                                                                                                                  |
| Obsessive-compulsive disorder                                             | 300.3                                                                                                                                                                                                                                                                                                                                                                                                                                                                 |
| Dysthymia (chronic depression)                                            | 300.4; 309.1; 301.11-12                                                                                                                                                                                                                                                                                                                                                                                                                                               |
| Oppositional defiant disorder                                             | 313.81                                                                                                                                                                                                                                                                                                                                                                                                                                                                |
| Related ICD-9-CM codes "severe"                                           | 296.20, 23, 24, 30, 33, 34; 301.20; 312.03, 13, 21; V11.0                                                                                                                                                                                                                                                                                                                                                                                                             |
|                                                                           | <b>Moderate</b>                                                                                                                                                                                                                                                                                                                                                                                                                                                       |
| Panic disorder                                                            | 300.01, 21                                                                                                                                                                                                                                                                                                                                                                                                                                                            |
| Separation anxiety disorder                                               | 309.21                                                                                                                                                                                                                                                                                                                                                                                                                                                                |
| Attention deficit/hyperactivity conditions                                | 314(all)                                                                                                                                                                                                                                                                                                                                                                                                                                                              |
| Agoraphobia without panic                                                 | 300.22                                                                                                                                                                                                                                                                                                                                                                                                                                                                |
| Conduct conditions                                                        | 312.00, 02, 10, 12, 20, 22; 312.4, 8, 9                                                                                                                                                                                                                                                                                                                                                                                                                               |
| Posttraumatic stress disorder                                             | 309.81                                                                                                                                                                                                                                                                                                                                                                                                                                                                |
| Drug abuse                                                                | 292(all); 305.20-23, 30-33, 40-43, 50-53, 60-63, 70-73, 80-83, 90-93                                                                                                                                                                                                                                                                                                                                                                                                  |
| Alcohol dependence                                                        | 303.9(all); 357.5; 425.5; 535.3; 571.0, 1, 2, 3; V11.3                                                                                                                                                                                                                                                                                                                                                                                                                |
| Any impulse control conditions                                            | 312.30-33, 39                                                                                                                                                                                                                                                                                                                                                                                                                                                         |
| Generalized anxiety disorder                                              | 300.00, 02, 09; 300.1(all); 300.20                                                                                                                                                                                                                                                                                                                                                                                                                                    |
| Major depressive disorder (except for chronic depression, which is above) | 296.22, 25, 32, 35; 311                                                                                                                                                                                                                                                                                                                                                                                                                                               |
|                                                                           | <b>Mild</b>                                                                                                                                                                                                                                                                                                                                                                                                                                                           |
| Social phobia                                                             | 300.23                                                                                                                                                                                                                                                                                                                                                                                                                                                                |
| Alcohol abuse                                                             | 291(all); 303.00-03; 305.00-03; V79.1; 790.3                                                                                                                                                                                                                                                                                                                                                                                                                          |
| Intermittent explosive disorder                                           | 312.34, 35                                                                                                                                                                                                                                                                                                                                                                                                                                                            |
| Any anxiety disorder (other anxiety)                                      | 300.23, 89; 300.5, 9; 308(all); 313.0, 1, 3; 313.21, 22, 82, 83                                                                                                                                                                                                                                                                                                                                                                                                       |
| Any other disorder (other mental and substance-use disorders)             | 309.0; 309.22-24, 28, 29, 82, 83, 89; 309.3, 4, 9; 299(all); 307.3, 6, 7; 313.23, 89; 313.9; 307.20-23; 333.92; 301.0, 3, 4, 6, 7, 9; 301.10, 13, 21, 22, 50, 51, 59, 81-84, 89; 300.6, 7; 300.81, 82; 302.0, 1, 2, 3, 4, 6, 9; 302.50-53, 70-76, 79, 81-85, 89; 306.0, 1, 2, 3, 4, 6, 7, 8, 9; 306.50-53, 59; 307.40-49, 80, 81, 89; 648.4(all); V11.1, 2, 8, 9; V15.4, V15.41, 42, 49; V40.2, 3, 9; V66.3; V67.3; V71.01, 02, 09; V79.0, 8, 9; 307.1; 307.50-54, 59 |
| Specific phobia                                                           | 300.29                                                                                                                                                                                                                                                                                                                                                                                                                                                                |
| Related ICD-9-CM codes specified "mild"                                   | 312.01, 11, 23; 296.21, 26, 31, 36; V65.42                                                                                                                                                                                                                                                                                                                                                                                                                            |

Source: <https://www.hcup-us.ahrq.gov/reports/SOI.jsp#data>

**eTable 3. Logistic Regression Analysis (sensitivity)**

| <b>Variables</b>                                                      | <b>OR (95% CI)</b>    |
|-----------------------------------------------------------------------|-----------------------|
| <b><i>Patient Characteristics</i></b>                                 |                       |
| Age 31 to 40                                                          | 0.93 (0.91,0.94)**    |
| Age 41 to 50                                                          | 0.85 (0.83,0.86)**    |
| Age 51 to 64                                                          | 0.70 (0.68,0.70)**    |
| Black                                                                 | 1.37 (1.35,1.40)**    |
| Hispanic                                                              | 0.93 (0.92,0.94)**    |
| Other Race                                                            | 0.50 (0.49,0.52)**    |
| Race Unknown                                                          | 0.91 (0.89,0.94)**    |
| Male                                                                  | 0.81 (0.80,0.82)**    |
| Medicare Insured, Ever                                                | 2.35 (2.30,2.41)**    |
| Medicaid Insured, Ever                                                | 2.68 (2.64,2.72)**    |
| Uninsured, Ever                                                       | 2.05 (2.02,2.07)**    |
| Medium Poverty in Patient's Zip Code                                  | 1.21 (1.19,1.23)**    |
| High Poverty in Patient's Zip Code                                    | 1.30 (1.27,1.32)**    |
| Urban County of Patient Residence                                     | 0.89 (0.86,0.93)**    |
| Psychiatrists per 10,000 Persons in Patient's County                  | 0.95 (0.94,0.95)**    |
| <b><i>Visit Characteristics</i></b>                                   |                       |
| Frequent User (4-10 visits), Last Year                                | 3.00 (2.93,3.08)**    |
| Frequent User (11-17 visits), Last Year                               | 5.19 (4.56,5.91)**    |
| Frequent User (18+ visits), Last Year                                 | 22.76 (14.45,35.85)** |
| Admitted Inpatient                                                    | 15.97 (15.63,16.33)** |
| <b><i>Diagnoses</i></b>                                               |                       |
| Mental illness                                                        | 1.75 (1.66,1.85)**    |
| Mild MH Diagnosis (HCUP)                                              | 1.05 (1.03,1.06)**    |
| Moderate MH Diagnosis (HCUP)                                          | 1.17 (1.16,1.19)**    |
| Severe MH Diagnosis (HCUP)                                            | 1.30 (1.28,1.32)**    |
| Primary MH Diagnosis                                                  | 1.46 (1.44,1.49)**    |
| Infectious and parasitic diseases                                     | 0.95 (0.93,0.97)**    |
| Neoplasms                                                             | 1.01 (0.98,1.04)      |
| Endocrine; nutritional; and metabolic diseases and immunity disorders | 0.92 (0.91,0.94)**    |
| Diseases of the blood and blood-forming organs                        | 0.67 (0.65,0.69)**    |
| Diseases of the nervous system and sense organs                       | 1.36 (1.34,1.38)**    |
| Diseases of the circulatory system                                    | 1.06 (1.04,1.08)**    |
| Diseases of the respiratory system                                    | 1.33 (1.32,1.35)**    |
| Diseases of the digestive system                                      | 1.15 (1.14,1.17)**    |
| Diseases of the genitourinary system                                  | 1.25 (1.23,1.27)**    |
| Complications of pregnancy; childbirth; and the puerperium            | 0.93 (0.91,0.95)**    |
| Diseases of the skin and subcutaneous tissue                          | 1.39 (1.36,1.42)**    |
| Diseases of the musculoskeletal system and connective tissue          | 1.40 (1.38,1.43)**    |
| Congenital anomalies                                                  | 0.87 (0.81,0.94)**    |
| Certain conditions originating in the perinatal period                | 0.54 (0.30,0.96)*     |
| Injury and poisoning                                                  | 0.98 (0.97,1.0)*      |
| Symptoms; signs; and ill-defined conditions                           | 1.29 (1.27,1.31)**    |

**eTable 3. Logistic Regression Analysis (sensitivity), continued**

| <b>Interactions</b>                                                        |                    |
|----------------------------------------------------------------------------|--------------------|
| MH x Age 31 to 40                                                          | 1.10 (1.07,1.13)** |
| MH x Age 41 to 50                                                          | 1.09 (1.07,1.12)** |
| MH x Age 51 to 64                                                          | 0.97 (0.94,0.99)*  |
| MH x Male                                                                  | 1.05 (1.03,1.07)** |
| MH x Black                                                                 | 0.93 (0.91,0.95)** |
| MH x Hispanic                                                              | 1.07 (1.05,1.09)** |
| MH x Other Race                                                            | 1.31 (1.24,1.37)** |
| MH x Race Unknown                                                          | 1.11 (1.07,1.15)** |
| MH x Medicare Insured, Ever                                                | 0.73 (0.71,0.76)** |
| MH x Medicaid Insured, Ever                                                | 0.76 (0.74,0.78)** |
| MH x Uninsured, Ever                                                       | 0.81 (0.80,0.83)** |
| MH x Urban County of Patient Residence                                     | 0.96 (0.92,1.01)   |
| MH x Medium Poverty in Patient's Zip Code                                  | 0.93 (0.91,0.95)** |
| MH x High Poverty in Patient's Zip Code                                    | 0.90 (0.88,0.93)** |
| MH x Admitted Inpatient                                                    | 0.55 (0.53,0.56)** |
| MH x Psychiatrists per 10,000 Persons in Patient's County                  | 1.04 (1.03,1.05)** |
| MH x Frequent User (4-10 visits), Last Year                                | 0.63 (0.61,0.65)** |
| MH x Frequent User (11-17 visits), Last Year                               | 0.56 (0.49,0.64)** |
| MH x Infectious and parasitic diseases                                     | 1.06 (1.03,1.09)** |
| MH x Neoplasms                                                             | 0.89 (0.86,0.93)** |
| MH x Endocrine; nutritional; and metabolic diseases and immunity disorders | 0.91 (0.89,0.94)** |
| MH x Diseases of the blood and blood-forming organs                        | 1.10 (1.06,1.14)** |
| MH x Diseases of the nervous system and sense organs                       | 1.00 (0.99,1.03)   |
| MH x Diseases of the circulatory system                                    | 0.99 (0.96,1.01)   |
| MH x Diseases of the respiratory system                                    | 0.93 (0.91,0.95)** |
| MH x Diseases of the digestive system                                      | 1.05 (1.03,1.07)** |
| MH x Diseases of the genitourinary system                                  | 0.92 (0.90,0.94)** |
| MH x Complications of pregnancy; childbirth; and the puerperium            | 1.21 (1.16,1.26)** |
| MH x Diseases of the skin and subcutaneous tissue                          | 0.86 (0.84,0.89)** |
| MH x Diseases of the musculoskeletal system and connective tissue          | 0.98 (0.96,1.0)*   |
| MH x Congenital anomalies                                                  | 1.09 (0.99,1.19)+  |
| MH x Certain conditions originating in the perinatal period                | 1.64 (0.82,3.29)   |
| MH x Injury and poisoning                                                  | 1.20 (1.17,1.22)** |
| MH x Symptoms; signs; and ill-defined conditions                           | 1.13 (1.11,1.15)** |
| <b>N</b>                                                                   | <b>3,446,338</b>   |

Notes: Logistic regressions with outcome variable equal to one if the patient is labeled a "Frequent user" with 4 or more visits in the one-year period following the index visit. Odds ratios reported. Diagnoses are grouped according to the Health Care Cost and Utilization Project's Clinical Classification Software (CCS) and represent any diagnosis recorded in any visit to the emergency department (ED) or inpatient hospitalization following and ED visit. Statistical significance denoted by + (p<0.10), \* (p<0.05), \*\* (p<0.01). Abbreviations: MH = mental health.

**eTable 4. Regression Sensitivity Analysis: 2+ HCUP Diagnoses Needed to Categorize Mild/Moderate/Severe**

| <b>Variables</b>                                                      | <b>OR (95% CI)</b> |
|-----------------------------------------------------------------------|--------------------|
| <b><i>Patient Characteristics</i></b>                                 |                    |
| Age 31 to 40                                                          | 0.95 (0.94,0.95)** |
| Age 41 to 50                                                          | 0.89 (0.89,0.90)** |
| Age 51 to 64                                                          | 0.82 (0.81,0.83)** |
| Black                                                                 | 1.26 (1.25,1.27)** |
| Hispanic                                                              | 1.00 (0.99,1.00)   |
| Other Race                                                            | 0.70 (0.69,0.70)** |
| Race Unknown                                                          | 0.95 (0.94,0.96)** |
| Male                                                                  | 0.88 (0.88,0.89)** |
| Medicare Insured, Ever                                                | 1.81 (1.79,1.83)** |
| Medicaid Insured, Ever                                                | 1.94 (1.93,1.95)** |
| Uninsured, Ever                                                       | 1.61 (1.60,1.62)** |
| Medium Poverty in Patient's Zip Code                                  | 1.11 (1.10,1.12)** |
| High Poverty in Patient's Zip Code                                    | 1.17 (1.16,1.17)** |
| Urban County of Patient Residence                                     | 0.92 (0.91,0.93)** |
| Psychiatrists per 10,000 Persons in Patient's County                  | 0.96 (0.96,0.97)** |
| <b><i>Visit Characteristics</i></b>                                   |                    |
| Frequent User (4-10 visits), Last Year                                | 1.64 (1.62,1.66)** |
| Frequent User (11-17 visits), Last Year                               | 1.97 (1.86,2.08)** |
| Frequent User (18+ visits), Last Year                                 | 5.91 (5.00,6.98)** |
| Primary MH Diagnosis                                                  | 1.31 (1.30,1.33)** |
| Admitted Inpatient                                                    | 4.88 (4.83,4.93)** |
| <b><i>Diagnoses</i></b>                                               |                    |
| Mental illness                                                        | 1.38 (1.34,1.41)** |
| 2+ Mild MH Diagnoses (HCUP)                                           | 1.24 (1.22,1.26)** |
| 2+ Moderate MH Diagnoses (HCUP)                                       | 1.36 (1.34,1.37)** |
| 2+ Severe MH Diagnoses (HCUP)                                         | 1.24 (1.22,1.26)** |
| Infectious and parasitic diseases                                     | 1.00 (1.00,1.01)   |
| Neoplasms                                                             | 1.04 (1.03,1.05)** |
| Endocrine; nutritional; and metabolic diseases and immunity disorders | 0.99 (0.99,1.00)*  |
| Diseases of the blood and blood-forming organs                        | 0.83 (0.82,0.84)** |
| Diseases of the nervous system and sense organs                       | 1.22 (1.21,1.22)** |
| Diseases of the circulatory system                                    | 1.06 (1.05,1.06)** |
| Diseases of the respiratory system                                    | 1.22 (1.21,1.23)** |
| Diseases of the digestive system                                      | 1.13 (1.12,1.14)** |
| Diseases of the genitourinary system                                  | 1.19 (1.18,1.19)** |
| Complications of pregnancy; childbirth; and the puerperium            | 1.04 (1.03,1.05)** |
| Diseases of the skin and subcutaneous tissue                          | 1.33 (1.32,1.34)** |
| Diseases of the musculoskeletal system and connective tissue          | 1.25 (1.24,1.25)** |
| Congenital anomalies                                                  | 0.98 (0.95,1.00)+  |
| Certain conditions originating in the perinatal period                | 0.98 (0.82,1.18)   |

|                                                                                                                          |                    |
|--------------------------------------------------------------------------------------------------------------------------|--------------------|
| Injury and poisoning                                                                                                     | 0.98 (0.98,0.99)** |
| Symptoms; signs; and ill-defined conditions                                                                              | 1.17 (1.16,1.17)** |
| <b>eTable 4. Regression Sensitivity Analysis: 2+ HCUP Diagnoses Needed to Categorize Mild/Moderate/Severe, continued</b> |                    |
| <b>Interactions</b>                                                                                                      |                    |
| MH x Age 31 to 40                                                                                                        | 1.06 (1.04,1.07)** |
| MH x Age 41 to 50                                                                                                        | 1.04 (1.03,1.06)** |
| MH x Age 51 to 64                                                                                                        | 0.95 (0.94,0.97)** |
| MH x Male                                                                                                                | 1.04 (1.03,1.05)** |
| MH x Black                                                                                                               | 0.94 (0.93,0.95)** |
| MH x Hispanic                                                                                                            | 1.01 (1.00,1.02)   |
| MH x Other Race                                                                                                          | 1.10 (1.08,1.12)** |
| MH x Race Unknown                                                                                                        | 1.06 (1.04,1.08)** |
| MH x Medicare Insured, Ever                                                                                              | 0.85 (0.84,0.86)** |
| MH x Medicaid Insured, Ever                                                                                              | 0.87 (0.86,0.88)** |
| MH x Uninsured, Ever                                                                                                     | 0.92 (0.91,0.93)** |
| MH x Urban County of Patient Residence                                                                                   | 1.01 (0.99,1.03)   |
| MH x Medium Poverty in Patient's Zip Code                                                                                | 0.97 (0.96,0.98)** |
| MH x High Poverty in Patient's Zip Code                                                                                  | 0.96 (0.95,0.97)** |
| MH x Admitted Inpatient                                                                                                  | 0.68 (0.67,0.69)** |
| MH x Psychiatrists per 10,000 Persons in Patient's County                                                                | 1.02 (1.01,1.03)** |
| MH x Frequent User (4-10 visits), Last Year                                                                              | 0.66 (0.65,0.66)** |
| MH x Frequent User (11-17 visits), Last Year                                                                             | 0.59 (0.55,0.62)** |
| MH x Frequent User (18+ visits), Last Year                                                                               | 0.47 (0.40,0.56)** |
| MH x Infectious and parasitic diseases                                                                                   | 1.01 (1.00,1.02)   |
| MH x Neoplasms                                                                                                           | 0.93 (0.91,0.94)** |
| MH x Endocrine; nutritional; and metabolic diseases and immunity disorders                                               | 0.92 (0.91,0.93)** |
| MH x Diseases of the blood and blood-forming organs                                                                      | 0.99 (0.98,1.01)   |
| MH x Diseases of the nervous system and sense organs                                                                     | 1.03 (1.03,1.04)** |
| MH x Diseases of the circulatory system                                                                                  | 0.98 (0.97,0.99)** |
| MH x Diseases of the respiratory system                                                                                  | 0.95 (0.94,0.96)** |
| MH x Diseases of the digestive system                                                                                    | 1.01 (1.00,1.02)*  |
| MH x Diseases of the genitourinary system                                                                                | 0.94 (0.93,0.95)** |
| MH x Complications of pregnancy; childbirth; and the puerperium                                                          | 1.06 (1.04,1.08)** |
| MH x Diseases of the skin and subcutaneous tissue                                                                        | 0.87 (0.86,0.89)** |
| MH x Diseases of the musculoskeletal system and connective tissue                                                        | 1.00 (0.99,1.01)   |
| MH x Congenital anomalies                                                                                                | 1.03 (0.98,1.07)   |
| MH x Certain conditions originating in the perinatal period                                                              | 0.91 (0.71,1.17)   |
| MH x Injury and poisoning                                                                                                | 1.13 (1.12,1.14)** |
| MH x Symptoms; signs; and ill-defined conditions                                                                         | 1.10 (1.09,1.11)** |
| <b>N</b>                                                                                                                 | <b>3,446,338</b>   |

Notes: Negative binomial regression analysis (log link function) with an outcome variable indicating the total count of ED visits in the 365 days following the index visit. Results are reported as incidence rate ratios (IRRs). Two or more HCUP diagnoses required to classify severity, e.g. 2 or more instances of a "severe" mental health diagnosis required to classify as "severe." Diagnoses are grouped according to the Health Care Cost and Utilization Project's Clinical Classification Software (CCS) and represent any diagnosis recorded in any visit to the emergency department (ED) or inpatient hospitalization following and ED visit. The omitted diagnosis group is residual codes, unclassified, and E Codes (CCS category 18). Abbreviations: MH = mental health. Statistical significance denoted by + ( $p < 0.10$ ), \* ( $p < 0.05$ ), \*\* ( $p < 0.01$ ).
